# Supplementary material for: Production of Recombinant Peanut Allergen Ara h 2 using Lactococcus lactis
Source: PubMed Central journal article supplement (PMC2000909; doi:10.1186/1475-2859-6-28), 2007-08-21

SignalP-NN prediction (gram+ networks): Sequence

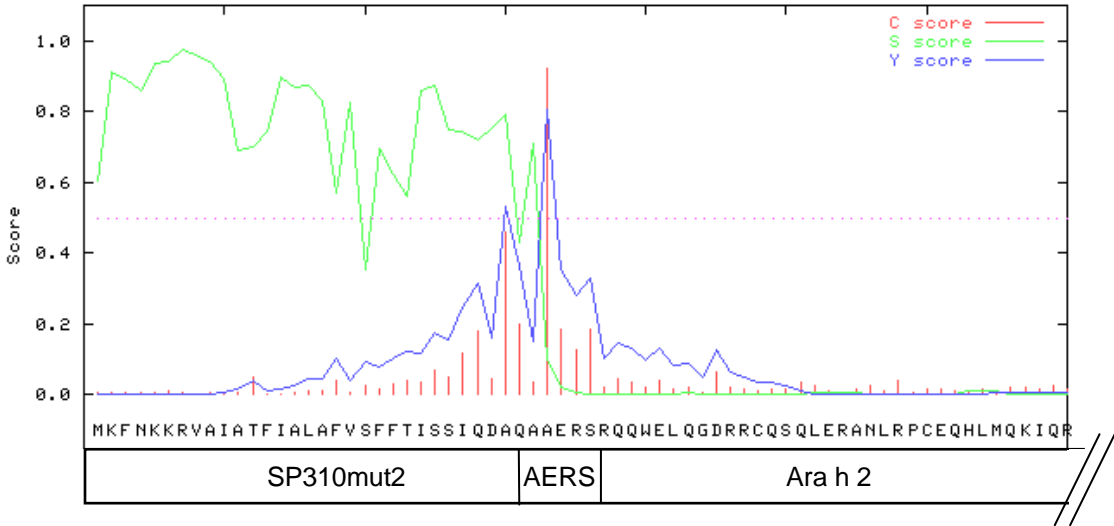

Supplement: 1475-2859-6-28-S1.pdf [file 1475-2859-6-28-S1.pdf]
